# Supplementary material
Source: PubMed Central journal article supplement (PMC7732933)
Supplement: 11357_2020_219_MOESM1_ESM.pdf [file 11357_2020_219_MOESM1_ESM.pdf]

# Supplemental Figure 1

A

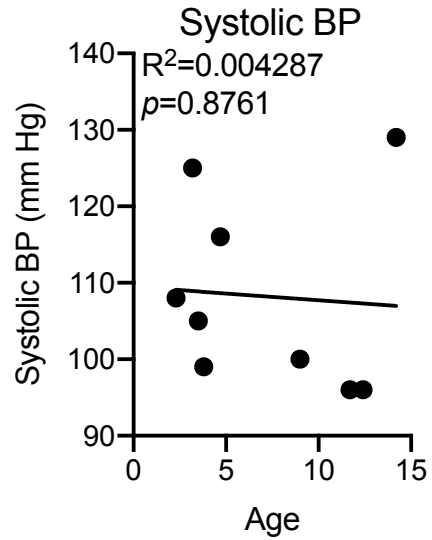

B

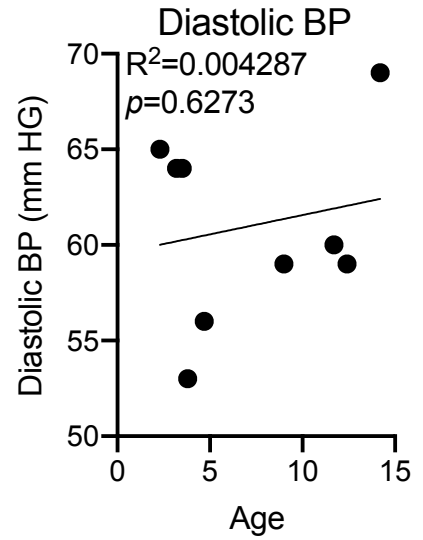

Supplemental Figure 1: Non-pregnant BP by age. (A) Linear regression analysis between third trimester systolic BP and maternal age in vervet monkeys.  $R^2=0.004287$ ;  $p=0.8761$ . (B) Linear regression analysis between third trimester diastolic BP and maternal age in vervet monkeys.  $R^2=0.004287$ ;  $p=0.6273$ .

# Supplemental Figure 2

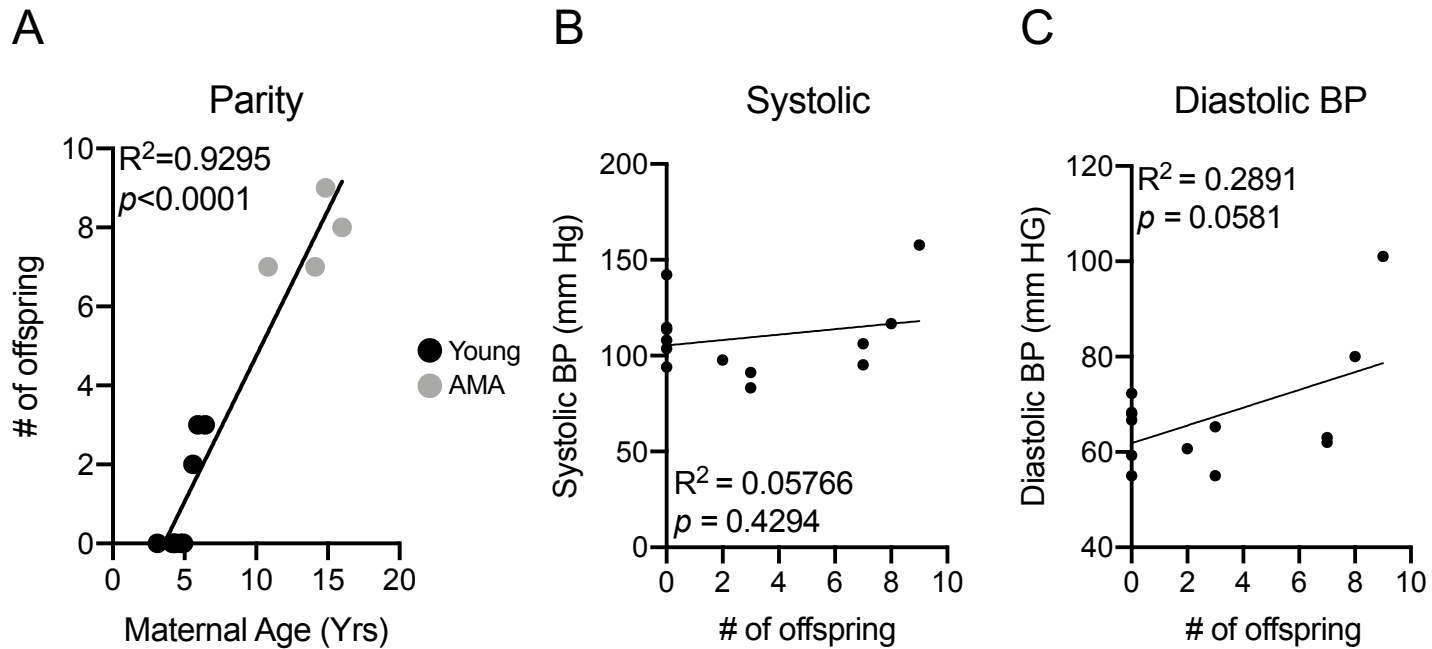

Supplemental Figure 2: Significant association between maternal age and number of offspring in studied cohort. (A) Linear regression between parity and maternal age.  $R^2=0.935$ ;  $p<0.0001$ .  $N=13$  monkeys. (B) Linear regression analysis between third trimester systolic BP and # of offspring in vervet monkeys.  $R^2=0.05766$ ;  $p=0.4294$ . (C) Linear regression analysis between third trimester diastolic BP and # of offspring in vervet monkeys.  $R^2=0.2891$ ;  $p=0.0581$ .

# Supplemental Figure 3

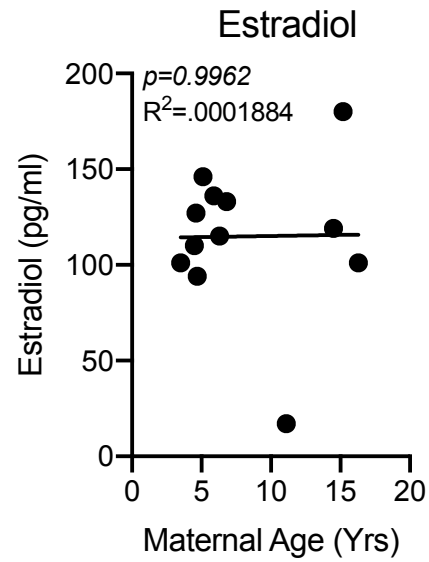

Supplemental Figure 3: Non-pregnant estradiol levels. Linear regression between maternal age and non-pregnant estradiol levels.  $R^2=0.0001884$ ;  $p<0.9962$ .  $N=13$  monkeys.

# Supplemental Figure 4

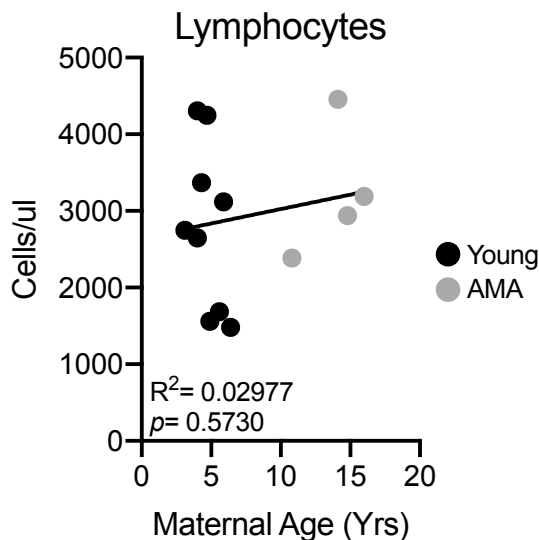

Supplemental Figure 4: Maternal age does not alter circulating lymphocyte counts. Linear regression between total lymphocyte count and maternal age.  $R^2=0.02977$ ;  $p=0.5730$ . N=13 monkeys.
